# Supplementary material for: Evolutionary Signals in Coronaviral Structural Proteins Suggest Possible Complex Mechanisms of Post-Translational Regulation in SARS-CoV-2 Virus
Source: MDPI journal article supplement (doi:10.3390/v14112469), 2022-11-08
Supplement: s1 [file s1]

**Supplementary Table S1.** Coronavirus species considered in this study. The RefSeq accession numbers, genera, subgenera and species names of the 38 coronaviruses are listed in the table.

| RefSeq      | Genus            | Subgenus      | Species                                               |
|-------------|------------------|---------------|-------------------------------------------------------|
| NC_022103.1 | Alphacoronavirus | Colacovirus   | Bat coronavirus CDPHE15                               |
| NC_018871.1 | Alphacoronavirus | Decacovirus   | Bat coronavirus HKU10                                 |
| NC_028814.1 | Alphacoronavirus | Decacovirus   | Rhinolophus ferrumequinum alphacoronavirus HuB-2013   |
| NC_002645.1 | Alphacoronavirus | Duvinacovirus | Human coronavirus 229E                                |
| NC_032730.1 | Alphacoronavirus | Luchacovirus  | Lucheng Rn rat coronavirus                            |
| NC_023760.1 | Alphacoronavirus | Minacovirus   | Mink coronavirus 1                                    |
| NC_010437.1 | Alphacoronavirus | Minunacovirus | Miniopterus bat coronavirus 1                         |
| NC_010438.1 | Alphacoronavirus | Minunacovirus | Miniopterus bat coronavirus HKU8                      |
| NC_028811.1 | Alphacoronavirus | Myotacovirus  | Myotis ricketti alphacoronavirus Sax-2011             |
| NC_028833.1 | Alphacoronavirus | Nyctacovirus  | Nyctalus velutinus alphacoronavirus SC-2013           |
| NC_003436.1 | Alphacoronavirus | Pedacovirus   | Porcine epidemic diarrhea virus                       |
| NC_009657.1 | Alphacoronavirus | Pedacovirus   | Scotophilus bat coronavirus 512                       |
| NC_009988.1 | Alphacoronavirus | Rhinacovirus  | Rhinolophus bat coronavirus HKU2                      |
| NC_005831.2 | Alphacoronavirus | Setracovirus  | Human coronavirus NL63                                |
| NC_032107.1 | Alphacoronavirus | Setracovirus  | NL63-related bat coronavirus strain BtKYNL63-9b       |
| NC_038861.1 | Alphacoronavirus | Tegacovirus   | Alphacoronavirus 1                                    |
| NC_006213.1 | Betacoronavirus  | Embecovirus   | Betacoronavirus 1                                     |
| NC_026011.1 | Betacoronavirus  | Embecovirus   | China Rattus coronavirus HKU24                        |
| NC_006577.2 | Betacoronavirus  | Embecovirus   | Human coronavirus HKU1                                |
| NC_012936.1 | Betacoronavirus  | Embecovirus   | Murine coronavirus                                    |
| NC_025217.1 | Betacoronavirus  | Hibecovirus   | Bat Hp-betacoronavirus Zhejiang2013                   |
| NC_039207.1 | Betacoronavirus  | Merbecovirus  | Hedgehog coronavirus 1                                |
| NC_038294.1 | Betacoronavirus  | Merbecovirus  | Middle East respiratory syndrome-related coronavirus  |
| NC_009020.1 | Betacoronavirus  | Merbecovirus  | Pipistrellus bat coronavirus HKU5                     |
| NC_009019.1 | Betacoronavirus  | Merbecovirus  | Tylonycteris bat coronavirus HKU4                     |
| NC_030886.1 | Betacoronavirus  | Nobecovirus   | Rousettus bat coronavirus GCCDC1                      |
| NC_009021.1 | Betacoronavirus  | Nobecovirus   | Rousettus bat coronavirus HKU9                        |
| NC_004718.3 | Betacoronavirus  | Sarbecovirus  | Severe acute respiratory syndrome-related coronavirus |
| NC_045512.2 | Betacoronavirus  | Sarbecovirus  | Severe acute respiratory syndrome coronavirus 2       |
| NC_016995.1 | Deltacoronavirus | Andecovirus   | Wigeon coronavirus HKU20                              |
| NC_011547.1 | Deltacoronavirus | Buldecovirus  | Bulbul coronavirus HKU11                              |
| NC_016996.1 | Deltacoronavirus | Buldecovirus  | Common moorhen coronavirus HKU21                      |
| NC_039208.1 | Deltacoronavirus | Buldecovirus  | Coronavirus HKU15                                     |
| NC_011550.1 | Deltacoronavirus | Buldecovirus  | Munia coronavirus HKU13                               |
| NC_016991.1 | Deltacoronavirus | Buldecovirus  | White-eye coronavirus HKU16                           |
| NC_016994.1 | Deltacoronavirus | Herdecovirus  | Night heron coronavirus HKU19                         |
| NC_010646.1 | Gammacoronavirus | Cegacovirus   | Beluga whale coronavirus SW1                          |
| NC_001451.1 | Gammacoronavirus | Igacovirus    | Avian coronavirus                                     |
