# Supplementary material for: Evolutionary Signals in Coronaviral Structural Proteins Suggest Possible Complex Mechanisms of Post-Translational Regulation in SARS-CoV-2 Virus
Source: MDPI journal article supplement (doi:10.3390/v14112469), 2022-11-08
Supplement: s1 [file s1]

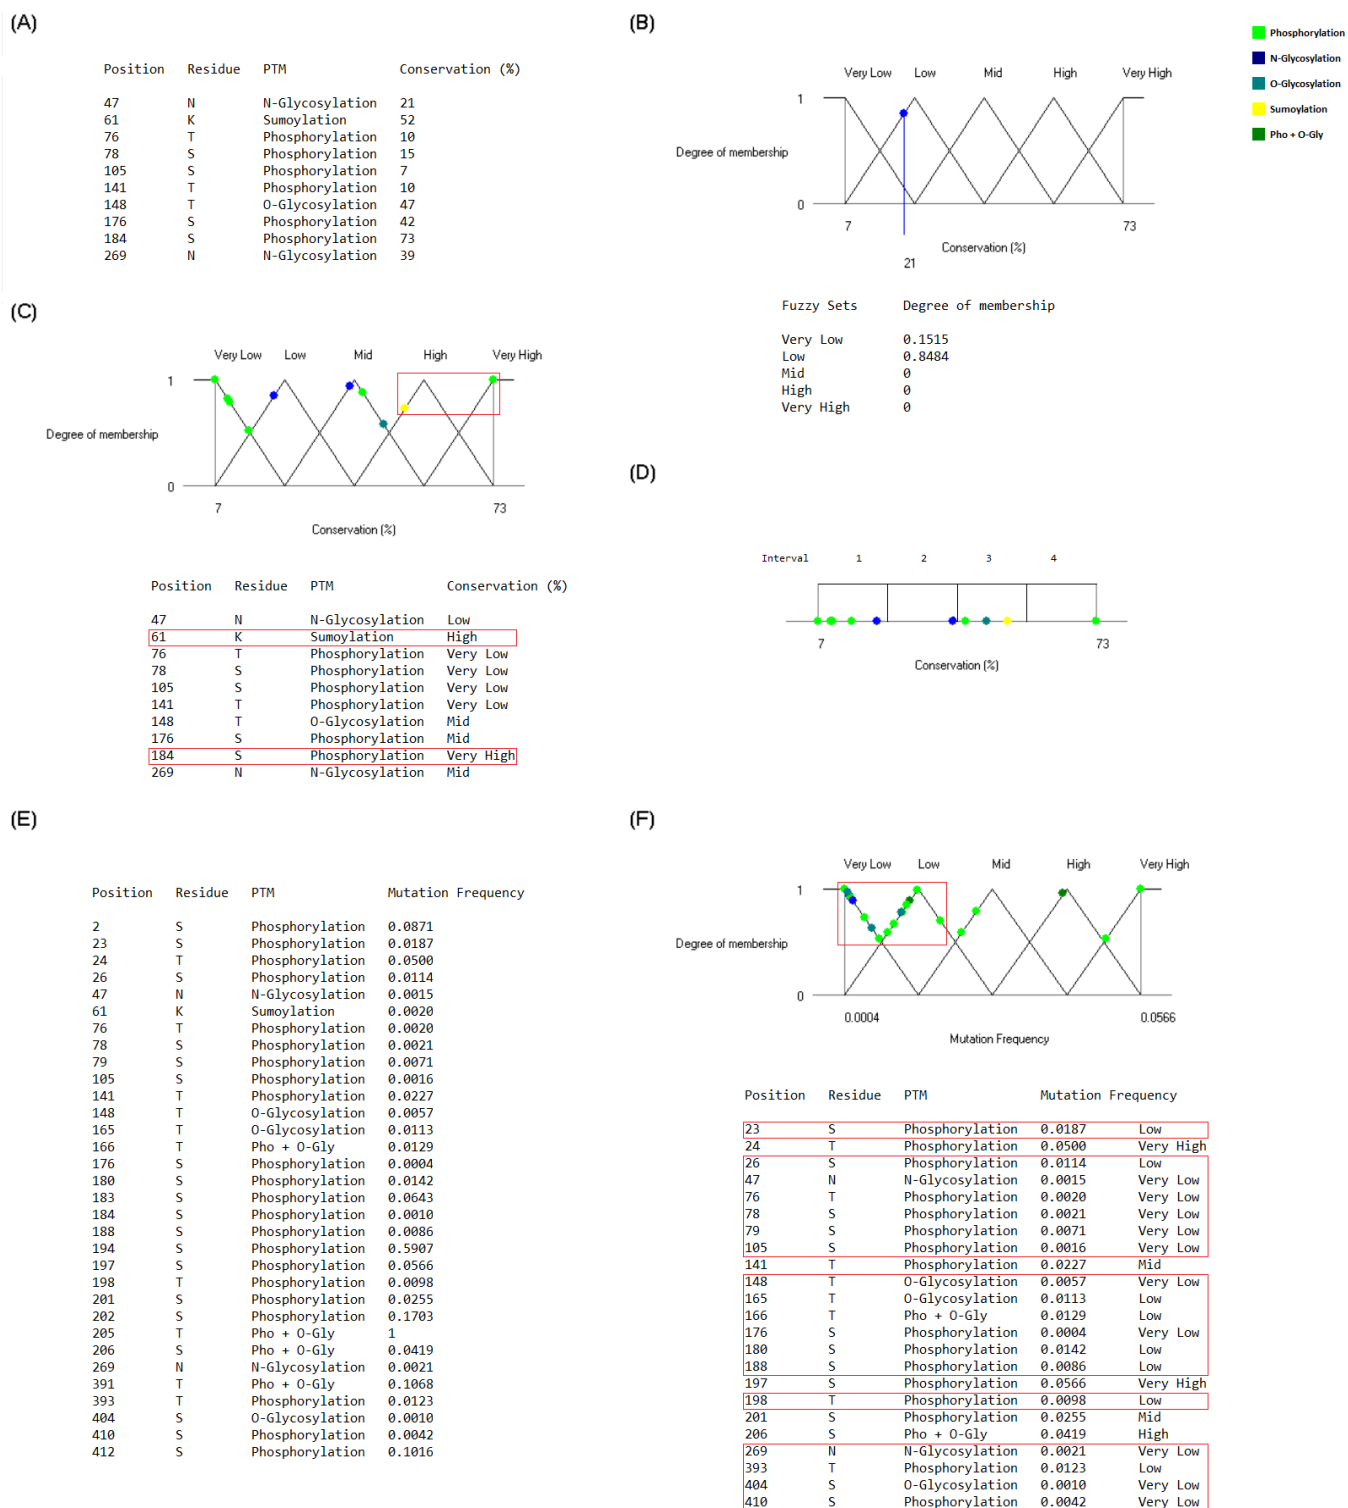

**Supplementary Figure S2.** Selection process based on fuzzy sets. (A) Degree of conservation of the 10 PTM sites in the nucleocapsid protein related to SARS-CoV-2 virus located in columns without gaps. (B) Linguistic variable representing the degree of conservation, the variable is defined with a group of five overlapping fuzzy sets, and calculation of the degree of membership of the value 21 to the different fuzzy sets, see subsection 2.7 for explanations. (C) Fuzzification of the numeric values related to the degree of conservation, the PTM sites with linguistic values “High” and “Very High” (framed in a red rectangle) are considered sites of interest. (D) Selection process based on crisp intervals instead of fuzzy sets, see subsection 2.7 for details. (E) Values of the mutation frequency for the 32 PTM sites in the nucleocapsid protein. (F) Selection process of the PTM sites with the lowest mutation frequency, the PTM sites of interest are those with linguistic values “Very Low” and “Low” (framed in a red rectangle), see subsection 2.7 for explanations. The PTMs are represented in different colors as indicated at the top right of the Figure.
