# Supplementary material for: Evolutionary Signals in Coronaviral Structural Proteins Suggest Possible Complex Mechanisms of Post-Translational Regulation in SARS-CoV-2 Virus
Source: MDPI journal article supplement (doi:10.3390/v14112469), 2022-11-08
Supplement: s1 [file s1]

**Supplementary Table S2.** Dataset of 142 PTMs. PTM sites are listed according to the species, protein and PTM type, the corresponding references are shown in the last column.

| Species                                               | Protein | PTM             | Sites                                                                                                                                            | References                                      |
|-------------------------------------------------------|---------|-----------------|--------------------------------------------------------------------------------------------------------------------------------------------------|-------------------------------------------------|
| Alphacoronavirus 1                                    | N       | Phosphorylation | S9, S156, S254, S256                                                                                                                             | [17]                                            |
| Murine coronavirus                                    | E       | Palmitoylation  | C40, C44, C47                                                                                                                                    | [18,19]                                         |
|                                                       | M       | O-Glycosylation | T5                                                                                                                                               | [20]                                            |
|                                                       | N       | Phosphorylation | S170, T177, S197                                                                                                                                 | [21,22]                                         |
| Severe acute respiratory syndrome-related coronavirus | S       | N-Glycosylation | N109, N118, N119, N158, N227, N318, N330, N357, N589, N699<br>N783, N1056, N1080, N1140, N1155, N1176                                            | [23,24,25]<br>[23,24,25]                        |
|                                                       | E       | N-Glycosylation | N66                                                                                                                                              | [26]                                            |
|                                                       | E       | Palmitoylation  | C40, C43, C44                                                                                                                                    | [27]                                            |
|                                                       | M       | N-Glycosylation | N4                                                                                                                                               | [28]                                            |
|                                                       | N       | Phosphorylation | S177, S189, S207                                                                                                                                 | [22,29]                                         |
|                                                       | N       | Sumoylation     | K62                                                                                                                                              | [30]                                            |
| Severe acute respiratory syndrome coronavirus 2       | S       | N-Glycosylation | N17, N61, N74, N122, N149, N165, N234, N282, N331, N334<br>N343, N603, N616, N657, N709, N717, N801, N1074, N1098, N1134<br>N1158, N1173, N1194  | [31-35]<br>[31-35]<br>[31-35]                   |
|                                                       | S       | O-Glycosylation | T323, S325, T676, T678                                                                                                                           | [33,36,37]                                      |
|                                                       | S       | Methylation     | R78, E224, E340, E654, E661                                                                                                                      | [35]                                            |
|                                                       | S       | Palmitoylation  | C1235, C1236, C1240, C1241, C1243, C1247, C1248, C1250, C1253, C1254                                                                             | [38]                                            |
|                                                       | S       | Phosphorylation | T29, S31, T240, S349, S459, S637, S640, Y789, T791, S816<br>S1161, S1196, S1261                                                                  | [39]<br>[39]                                    |
|                                                       | M       | Phosphorylation | T208, S211, S212, S213, S214                                                                                                                     | [39,40,41]                                      |
|                                                       | N       | Phosphorylation | S2, S23, T24, S26, T76, S78, S79, S105, T141, T166<br>S176, S180, S183, S184, S194, S197, T198, S201, S202, T205<br>S206, T391, T393, S410, S412 | [39,40,41,42]<br>[39,40,41,42]<br>[39,40,41,42] |
|                                                       | N       | N-Glycosylation | N47, N269                                                                                                                                        | [42]                                            |
|                                                       | N       | O-Glycosylation | T148, T165, T166, T205, S206, T391, S404                                                                                                         | [42]                                            |
| Avian coronavirus                                     | S       | N-Glycosylation | N212, N237, N247, N276, N513, N591, N1051, N1074                                                                                                 | [43]                                            |
|                                                       | N       | Phosphorylation | S190, S192, T378, S379                                                                                                                           | [44]                                            |
