# Supplementary material for: Evolutionary Signals in Coronaviral Structural Proteins Suggest Possible Complex Mechanisms of Post-Translational Regulation in SARS-CoV-2 Virus
Source: Viruses. 2022 Nov 8;14(11):2469. doi: 10.3390/v14112469 (PMC9696223; doi:10.3390/v14112469)
Supplement: Supplementary file 1 [file viruses-14-02469-s001.zip]

Archive with 8 entries (8 files):
- Supplementary_Figure_S1.pdf
- Supplementary_Figure_S2.pdf
- Supplementary_Figure_S3.pdf
- Supplementary_Figure_S4.pdf
- Supplementary_Figure_S5.pdf
- Supplementary_Figure_S6.pdf
- Supplementary_Table_S1.pdf
- Supplementary_Table_S2.pdf
